# Supplementary material
Source: publisher figshare collection journal article supplement (https://acs.figshare.com/ndownloader/files/5731326)
Supplement: Supplementary file 1 [file 5731326]

Ortep Diagrams of Compounds 9,15, 11s – All are at the 50% probability level.

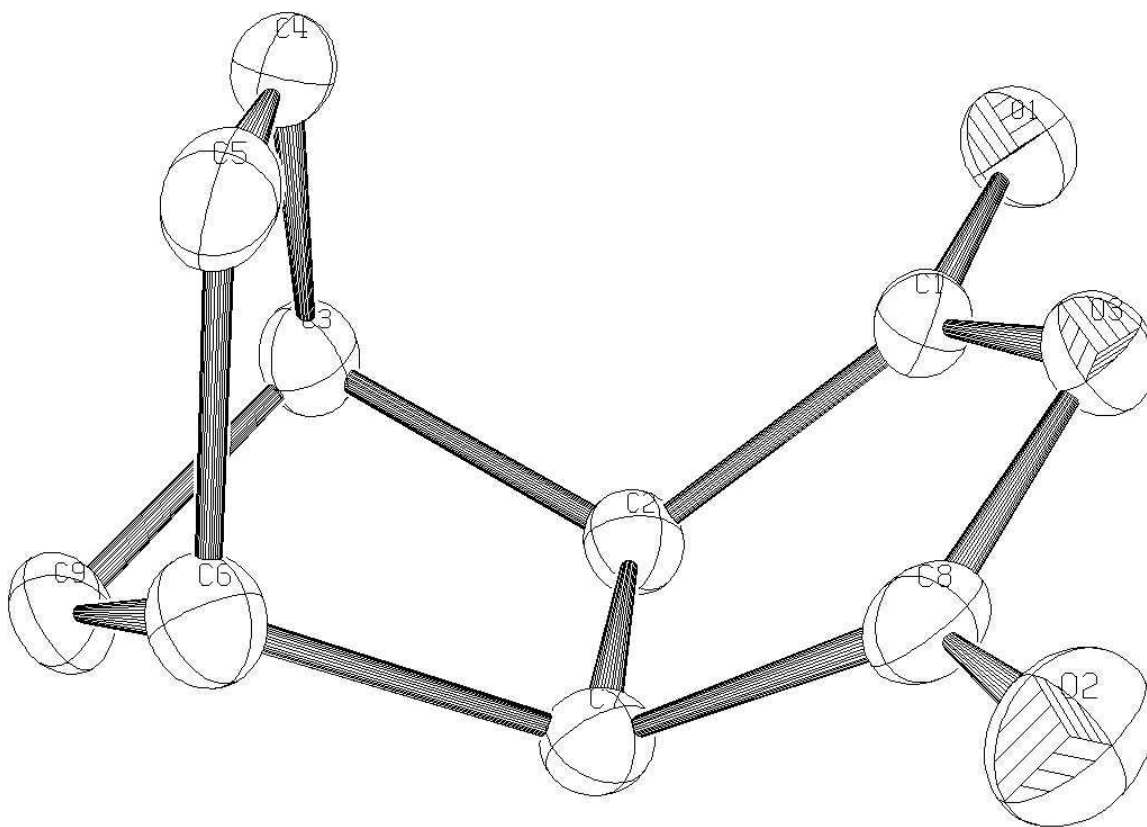

Compound 9

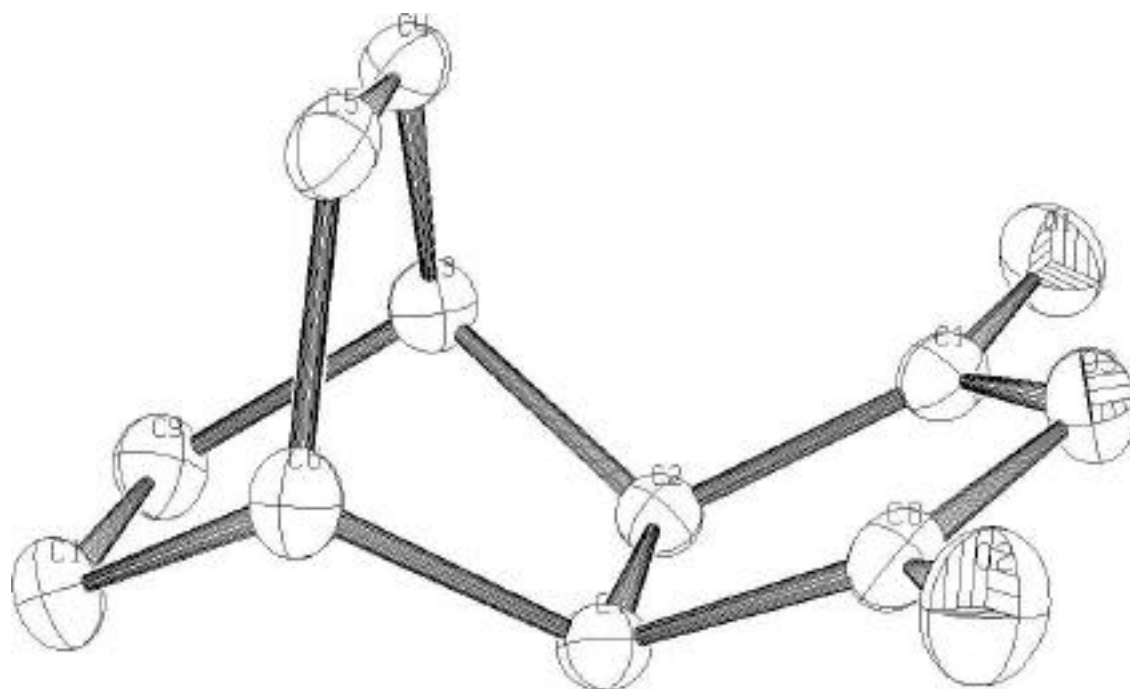

Compound 10

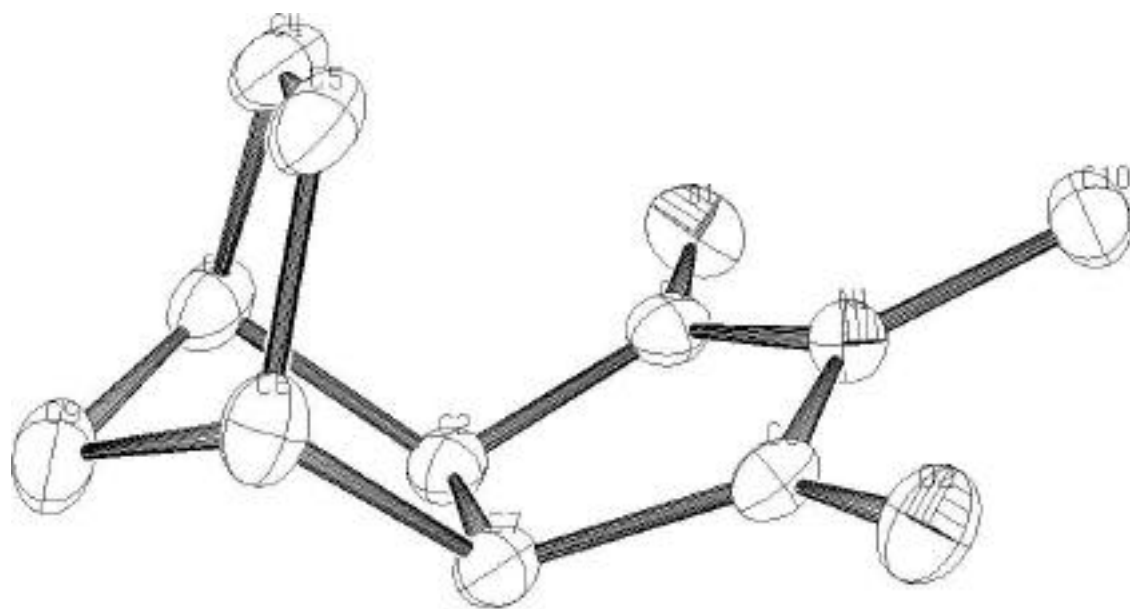

Compound 11

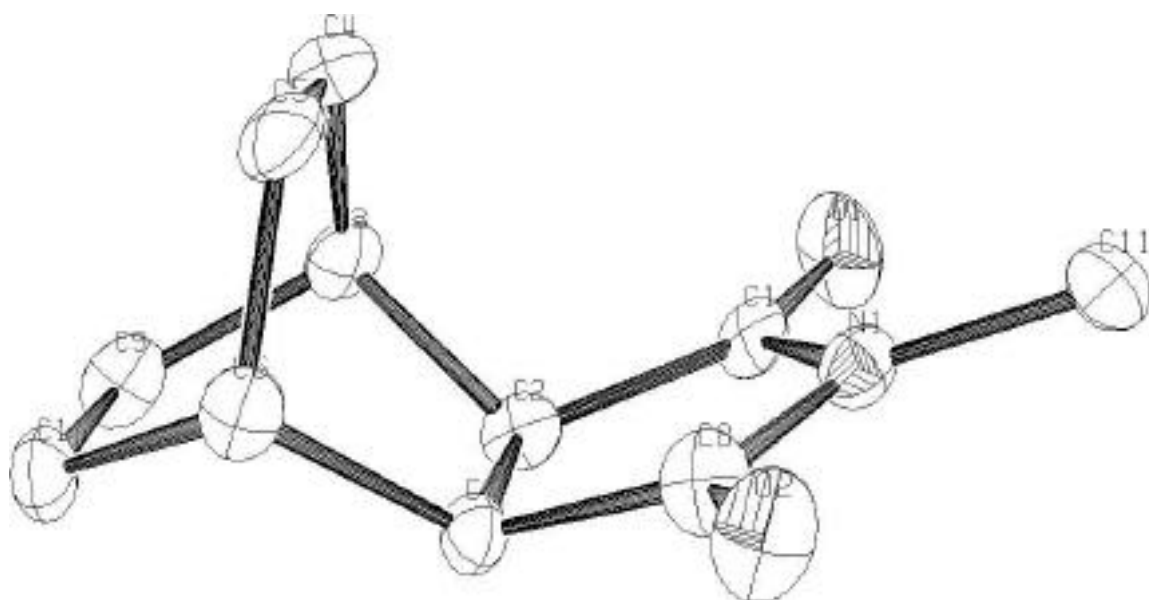

Compound 12

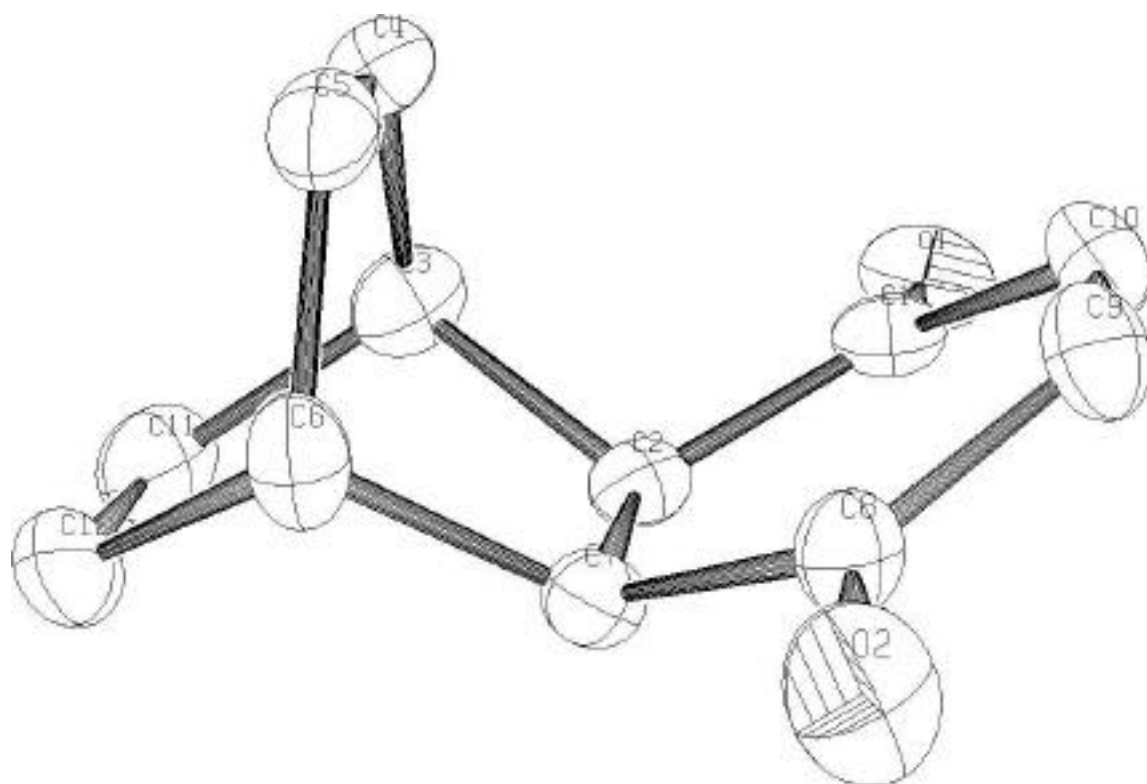

Compound 13

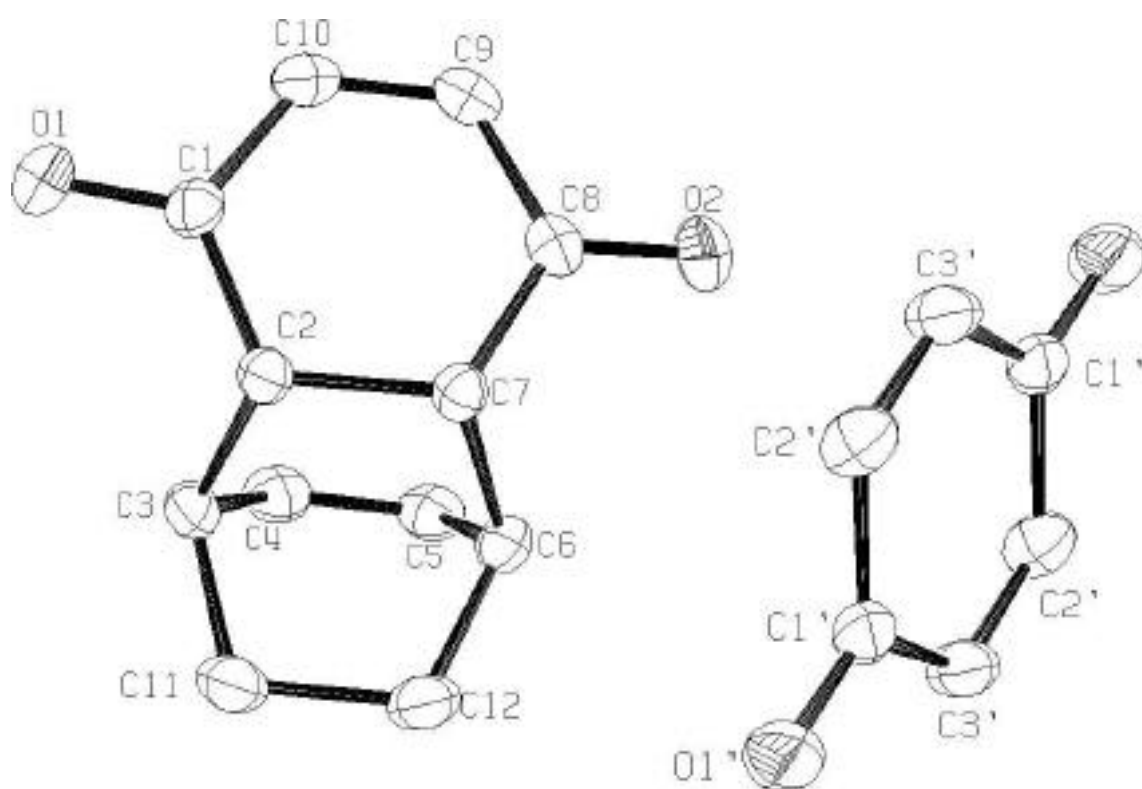

Compound 13.Q

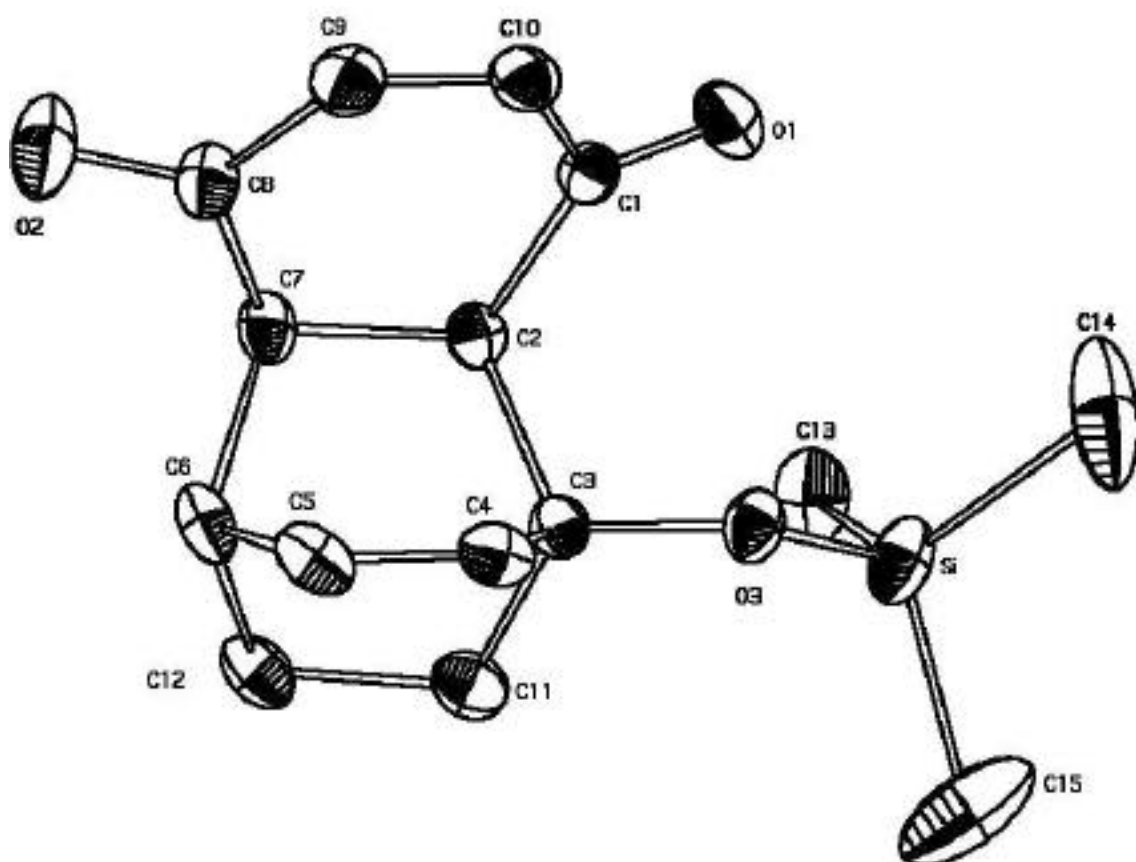

Compound 14

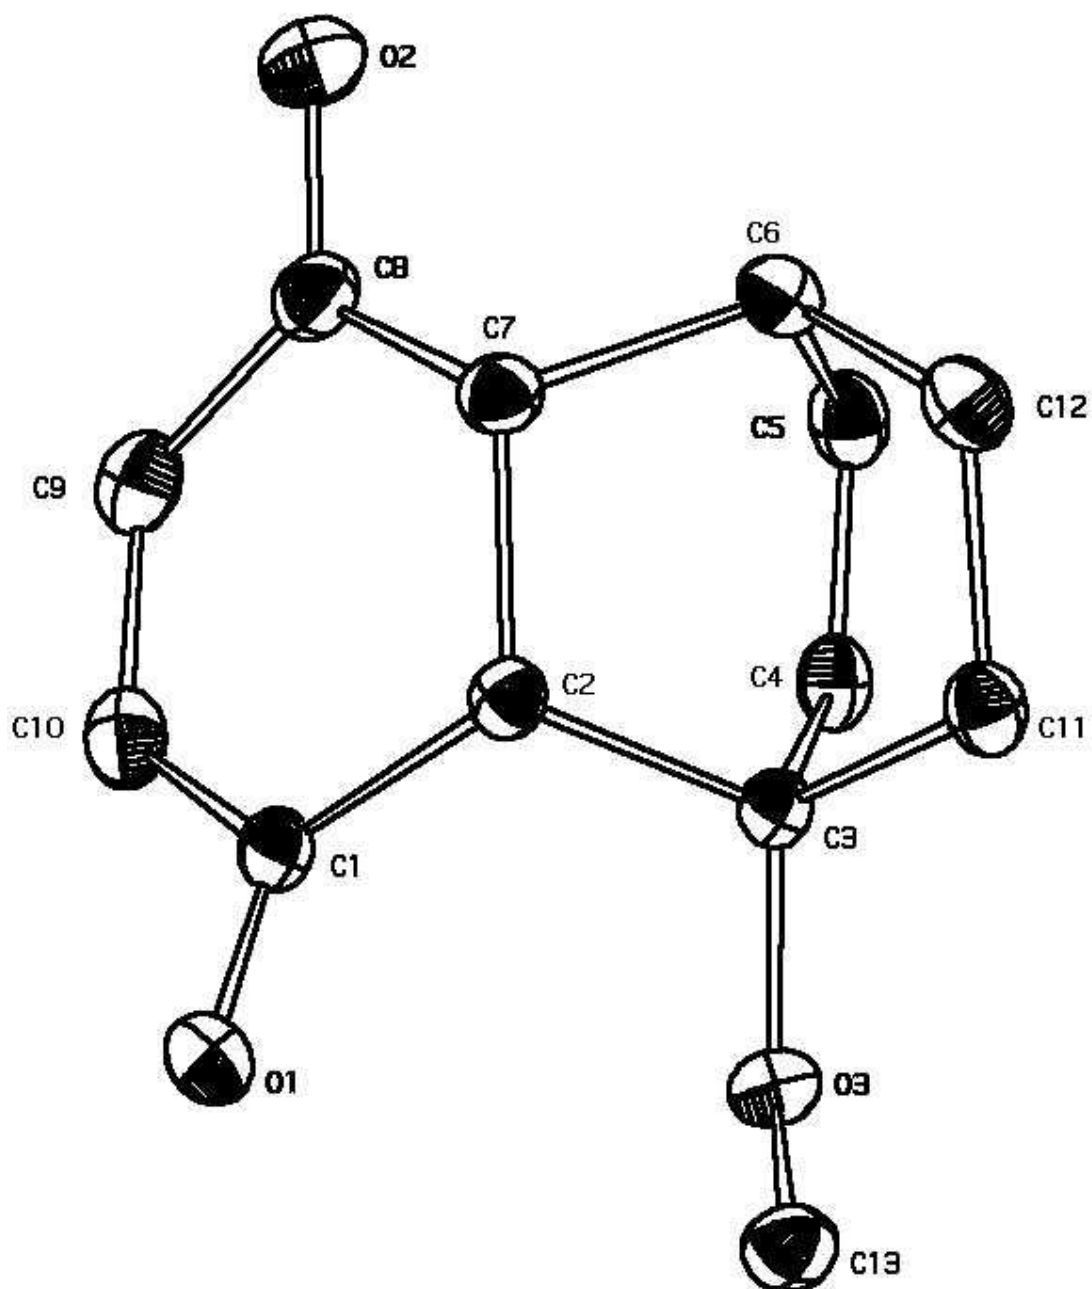

Compound 15



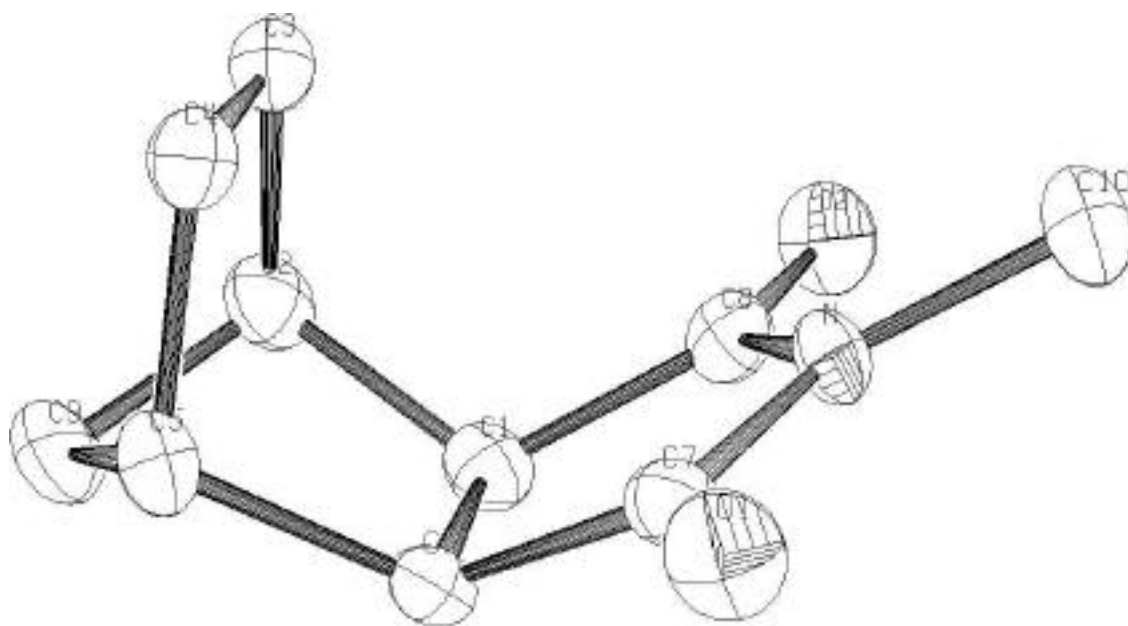

Compound 11s.
